# Supplementary material
Source: MDPI journal article supplement (https://www.mdpi.com/1996-1073/15/9/3179)
Supplement: s1 [file s1]

|                                                                                                                                                                                                             | Survey 2 |           |          |           |
|-------------------------------------------------------------------------------------------------------------------------------------------------------------------------------------------------------------|----------|-----------|----------|-----------|
|                                                                                                                                                                                                             | QC       | BC        | Other    | Total     |
| <b>Number of mills</b>                                                                                                                                                                                      | <b>7</b> | <b>11</b> | <b>5</b> | <b>23</b> |
| <b>Q1 - Between the start of the second COVID-19 wave in October 2020 and the end of April 2021, feedstock prices for my mill have:</b>                                                                     |          |           |          |           |
| Significantly decreased (more than 20%) compared to the prices between March and September 2020                                                                                                             | 0        | 0         | 0        | 0         |
|                                                                                                                                                                                                             | 0.0%     | 0.0%      | 0.0%     | 0.0%      |
| Moderately decreased (between 5% and 20%) compared to the prices between March and September 2020                                                                                                           | 0        | 0         | 0        | 0         |
|                                                                                                                                                                                                             | 0.0%     | 0.0%      | 0.0%     | 0.0%      |
| Remained about the same (±5%) compared to the prices between March and September 2020                                                                                                                       | 4        | 9         | 3        | 16        |
|                                                                                                                                                                                                             | 57.1%    | 81.8%     | 60.0%    | 69.6%     |
| Moderately increased (between 5% and 20%) compared to the prices between March and September 2020                                                                                                           | 2        | 2         | 1        | 5         |
|                                                                                                                                                                                                             | 28.6%    | 18.2%     | 20.0%    | 21.7%     |
| Significantly increased more than 20 % compared to the prices between March and September 2020                                                                                                              | 1        | 0         | 1        | 2         |
|                                                                                                                                                                                                             | 14.3%    | 0.0%      | 20.0%    | 8.7%      |
| <b>Q2 - Between the start of the second COVID-19 wave in October 2020 and the end of April 2021, the feedstock mix for my mill:</b>                                                                         |          |           |          |           |
| Remained the same as between March and September 2020                                                                                                                                                       | 5        | 2         | 3        | 10        |
|                                                                                                                                                                                                             | 71.4%    | 18.2%     | 60.0%    | 43.5%     |
| Includes more non-sawmill residues (e.g. roundwood, harvest residues) than between March and September 2020                                                                                                 | 1        | 0         | 0        | 1         |
|                                                                                                                                                                                                             | 14.3%    | 0.0%      | 0.0%     | 4.3%      |
| Includes less non-sawmill residues (e.g. roundwood, harvest residues), so more sawmill residues, than between March and September 2020                                                                      | 0        | 8         | 2        | 10        |
|                                                                                                                                                                                                             | 0.0%     | 72.7%     | 40.0%    | 43.5%     |
| Do not know / unsure                                                                                                                                                                                        | 1        | 1         | 0        | 2         |
|                                                                                                                                                                                                             | 14.3%    | 9.1%      | 0.0%     | 8.7%      |
| <b>Q4 - Between the start of the second COVID-19 wave in October 2020 and the end of April 2021, the overall availability of feedstock for my mill:</b>                                                     |          |           |          |           |
| Remained the same                                                                                                                                                                                           | 2        | 2         | 3        | 7         |
|                                                                                                                                                                                                             | 28.6%    | 18.2%     | 60.0%    | 30.4%     |
| Increased                                                                                                                                                                                                   | 4        | 9         | 2        | 15        |
|                                                                                                                                                                                                             | 57.1%    | 81.8%     | 40.0%    | 65.2%     |
| Decreased                                                                                                                                                                                                   | 1        | 0         | 0        | 1         |
|                                                                                                                                                                                                             | 14.3%    | 0.0%      | 0.0%     | 4.3%      |
| Do not know / unsure                                                                                                                                                                                        | 0        | 0         | 0        | 0         |
|                                                                                                                                                                                                             | 0.0%     | 0.0%      | 0.0%     | 0.0%      |
| <b>Q5 - Once the COVID-19 pandemic is under control in Canada and people can return to a normal life (planned for late 2021 or early 2022 at the moment), the feedstock mix for my mill is expected to:</b> |          |           |          |           |
| Return to what it was prior to the COVID-19 pandemic                                                                                                                                                        | 1        | 9         | 2        | 12        |
|                                                                                                                                                                                                             | 14.3%    | 81.8%     | 40.0%    | 52.2%     |
| Change (either include more or less sawmill residues) because of the repercussions of the COVID-19 pandemic                                                                                                 | 4        | 1         | 0        | 5         |
|                                                                                                                                                                                                             | 57.1%    | 9.1%      | 0.0%     | 21.7%     |
| Change (either include more or less sawmill residues) because of reasons unrelated to the COVID-19 pandemic                                                                                                 | 1        | 0         | 1        | 2         |
|                                                                                                                                                                                                             | 14.3%    | 0.0%      | 20.0%    | 8.7%      |
| Do not know / unsure                                                                                                                                                                                        | 1        | 2         | 2        | 5         |
|                                                                                                                                                                                                             | 14.3%    | 18.2%     | 40.0%    | 21.7%     |

|                                                                                                                                                                                             |       |        |       |       |
|---------------------------------------------------------------------------------------------------------------------------------------------------------------------------------------------|-------|--------|-------|-------|
| <b>Q6 - Has transportation of material inputs or finished products at your mill been disrupted between the start of the second COVID-19 wave in October 2020 and the end of April 2021?</b> |       |        |       |       |
| Yes                                                                                                                                                                                         | 2     | 1      | 2     | 5     |
|                                                                                                                                                                                             | 28.6% | 9.1%   | 40.0% | 21.7% |
| No                                                                                                                                                                                          | 5     | 10     | 3     | 18    |
|                                                                                                                                                                                             | 71.4% | 90.9%  | 60.0% | 78.3% |
| Do not know / unsure                                                                                                                                                                        | 0     | 0      | 0     | 0     |
|                                                                                                                                                                                             | 0.0%  | 0.0%   | 0.0%  | 0.0%  |
| <b>Q7 - If applicable, which aspects of transporting material inputs or finished products has been disrupted?</b>                                                                           |       |        |       |       |
| Transporting feedstocks into my facility                                                                                                                                                    |       |        |       |       |
| Transporting other inputs into my facility                                                                                                                                                  | 1     | 1      | 1     | 3     |
|                                                                                                                                                                                             | 14.3% | 9.1%   | 20.0% | 13.0% |
| Transporting wood pellets out from my facility to bulk storage / port                                                                                                                       | 2     | 1      | 0     | 3     |
|                                                                                                                                                                                             | 28.6% | 9.1%   | 0.0%  | 13.0% |
| Transporting wood pellets out of the bulk storage / port to the final destination                                                                                                           | 1     | 0      | 1     | 2     |
|                                                                                                                                                                                             | 14.3% | 0.0%   | 20.0% | 8.7%  |
| Other                                                                                                                                                                                       |       |        |       |       |
|                                                                                                                                                                                             |       |        |       |       |
| <b>Q8 - Between the start of the second COVID-19 wave in October 2020 and end of April 2021, the access to transportation services for shipping raw materials:</b>                          |       |        |       |       |
| Remained the same as before the COVID-19 pandemic                                                                                                                                           | 6     | 10     | 4     | 20    |
|                                                                                                                                                                                             | 85.7% | 90.9%  | 80.0% | 87.0% |
| Worsened, even further than the situation between March and September 2020                                                                                                                  | 1     | 1      | 1     | 3     |
|                                                                                                                                                                                             | 14.3% | 9.1%   | 20.0% | 13.0% |
| Do not know / unsure                                                                                                                                                                        | 0     | 0      | 0     | 0     |
|                                                                                                                                                                                             | 0.0%  | 0.0%   | 0.0%  | 0.0%  |
| <b>Q9 - Between the start of the second COVID-19 wave in October 2020 and the end of April 2021, the access to transportation services for shipping finished products:</b>                  |       |        |       |       |
| Remained the same, as during the first wave and before the COVID-19 pandemic                                                                                                                | 5     | 11     | 3     | 19    |
|                                                                                                                                                                                             | 71.4% | 100.0% | 60.0% | 82.6% |
| Worsened, even further than the situation between March and September 2020                                                                                                                  | 2     | 0      | 1     | 3     |
|                                                                                                                                                                                             | 28.6% | 0.0%   | 20.0% | 13.0% |
| Do not know / unsure                                                                                                                                                                        | 0     | 0      | 1     | 1     |
|                                                                                                                                                                                             | 0.0%  | 0.0%   | 20.0% | 4.3%  |
| <b>Q10 - Has your mill experienced any COVID-19 related labour shortages between the start of the second COVID-19 wave in October 2020 and the end of April 2021?</b>                       |       |        |       |       |
| No                                                                                                                                                                                          | 1     | 3      | 3     | 7     |
|                                                                                                                                                                                             | 14.3% | 27.3%  | 60.0% | 30.4% |
| Yes                                                                                                                                                                                         | 6     | 8      | 2     | 16    |
|                                                                                                                                                                                             | 85.7% | 72.7%  | 40.0% | 69.6% |

|                                                                                                                                                                                                                                       |       |        |        |       |
|---------------------------------------------------------------------------------------------------------------------------------------------------------------------------------------------------------------------------------------|-------|--------|--------|-------|
| <b>Q11 - Between the start of the second COVID-19 wave in October 2020 and the end of April 2021, did your mill have to close?</b>                                                                                                    |       |        |        |       |
| No                                                                                                                                                                                                                                    | 6     | 11     | 5      | 22    |
|                                                                                                                                                                                                                                       | 85.7% | 100.0% | 100.0% | 95.7% |
| Yes (1 to 4 weeks)                                                                                                                                                                                                                    | 1     | 0      | 0      | 1     |
|                                                                                                                                                                                                                                       | 14.3% | 0.0%   | 0.0%   | 4.3%  |
| Yes (5 to 10 weeks)                                                                                                                                                                                                                   | 0     | 0      | 0      | 0     |
|                                                                                                                                                                                                                                       | 0.0%  | 0.0%   | 0.0%   | 0.0%  |
| Yes (more than 10 weeks)                                                                                                                                                                                                              | 0     | 0      | 0      | 0     |
|                                                                                                                                                                                                                                       | 0.0%  | 0.0%   | 0.0%   | 0.0%  |
| Do not know / unsure                                                                                                                                                                                                                  | 0     | 0      | 0      | 0     |
|                                                                                                                                                                                                                                       | 0.0%  | 0.0%   | 0.0%   | 0.0%  |
| <b>Q13 - Between the start of the second COVID-19 wave in October 2020 and the end of April 2021, has your mill experienced a change in production compared to normal levels for that time of year (either decrease or increase)?</b> |       |        |        |       |
| Yes, decrease in production                                                                                                                                                                                                           | 2     | 1      | 0      | 3     |
|                                                                                                                                                                                                                                       | 28.6% | 9.1%   | 0.0%   | 13.0% |
| Yes, increase in production                                                                                                                                                                                                           | 3     | 1      | 0      | 4     |
|                                                                                                                                                                                                                                       | 42.9% | 9.1%   | 0.0%   | 17.4% |
| No                                                                                                                                                                                                                                    | 2     | 9      | 5      | 16    |
|                                                                                                                                                                                                                                       | 28.6% | 81.8%  | 100.0% | 69.6% |
| <b>Q15 - Why was there a change in production levels?</b>                                                                                                                                                                             |       |        |        |       |
| Reduction because of labour shortages                                                                                                                                                                                                 | 1     | 0      | 0      | 1     |
|                                                                                                                                                                                                                                       | 14.3% | 0.0%   | 0.0%   | 4.3%  |
| Reduction in production due to lockdown                                                                                                                                                                                               | 1     | 0      | 0      | 1     |
|                                                                                                                                                                                                                                       | 14.3% | 0.0%   | 0.0%   | 4.3%  |
| Declining end use                                                                                                                                                                                                                     | 1     | 0      | 0      | 1     |
|                                                                                                                                                                                                                                       | 14.3% | 0.0%   | 0.0%   | 4.3%  |
| Increasing end use                                                                                                                                                                                                                    | 0     | 1      | 0      | 1     |
|                                                                                                                                                                                                                                       | 0.0%  | 9.1%   | 0.0%   | 4.3%  |
| Other                                                                                                                                                                                                                                 | 2     | 2      | 1      | 0     |
|                                                                                                                                                                                                                                       | 28.6% | 18.2%  | 20.0%  | 0.0%  |
| <b>Q16 - How did your mill adapt in their operations for COVID-19 between the start of the second wave in October 2020 and the end of April 2021?</b>                                                                                 |       |        |        |       |
| No changes                                                                                                                                                                                                                            | 1     | 10     | 1      | 12    |
|                                                                                                                                                                                                                                       | 14.3% | 90.9%  | 20.0%  | 52.2% |
| Additional health and safety measures (e.g., personal protective equipment, cleaning of work areas and surfaces)                                                                                                                      | 6     | 1      | 4      | 11    |
|                                                                                                                                                                                                                                       | 85.7% | 9.1%   | 80.0%  | 47.8% |
| Reorganized staffing levels because of social distancing requirements or other reasons                                                                                                                                                | 3     | 0      | 1      | 4     |
|                                                                                                                                                                                                                                       | 42.9% | 0.0%   | 20.0%  | 17.4% |
| Investment in equipment or machinery to replace labour                                                                                                                                                                                | 0     | 0      | 0      | 0     |
|                                                                                                                                                                                                                                       | 0.0%  | 0.0%   | 0.0%   | 0.0%  |

|                                                                                                                                                                                                            |       |       |       |       |
|------------------------------------------------------------------------------------------------------------------------------------------------------------------------------------------------------------|-------|-------|-------|-------|
| <b>Q17 - Between the start of the second COVID-19 wave in October 2020, and the end of April 2021, what additional support (since the previous survey) has been sought from the federal government?</b>    |       |       |       |       |
| Wage subsidies                                                                                                                                                                                             | 5     | 1     | 2     | 8     |
|                                                                                                                                                                                                            | 71.4% | 9.1%  | 40.0% | 34.8% |
| Subsidies to cover additional costs incurred because of COVID-19                                                                                                                                           | 1     | 1     | 0     | 2     |
|                                                                                                                                                                                                            | 14.3% | 9.1%  | 0.0%  | 8.7%  |
| Deferral of income taxes or sales tax                                                                                                                                                                      | 0     | 0     | 0     | 0     |
|                                                                                                                                                                                                            | 0.0%  | 0.0%  | 0.0%  | 0.0%  |
| Access to credit through loans, loan guarantees or emergency financing                                                                                                                                     | 0     | 0     | 0     | 0     |
|                                                                                                                                                                                                            | 0.0%  | 0.0%  | 0.0%  | 0.0%  |
| Other                                                                                                                                                                                                      | 0     | 0     | 0     | 0     |
|                                                                                                                                                                                                            | 0.0%  | 0.0%  | 0.0%  | 0.0%  |
| <b>Q18 - Between the start of the second COVID-19 wave in October 2020, and the end of April 2021, what additional support (since the previous survey) has been sought from the provincial government?</b> |       |       |       |       |
| Wage subsidies                                                                                                                                                                                             | 1     | 1     | 0     | 2     |
|                                                                                                                                                                                                            | 14.3% | 9.1%  | 0.0%  | 8.7%  |
| Subsidies to cover additional costs incurred because of COVID-19                                                                                                                                           | 1     | 1     | 1     | 3     |
|                                                                                                                                                                                                            | 14.3% | 9.1%  | 20.0% | 13.0% |
| Deferral of income taxes or sales tax                                                                                                                                                                      | 0     | 0     | 0     | 0     |
|                                                                                                                                                                                                            | 0.0%  | 0.0%  | 0.0%  | 0.0%  |
| Access to credit through loans, loan guarantees or emergency financing                                                                                                                                     | 0     | 0     | 0     | 0     |
|                                                                                                                                                                                                            | 0.0%  | 0.0%  | 0.0%  | 0.0%  |
| Other                                                                                                                                                                                                      | 0     | 0     | 0     | 0     |
|                                                                                                                                                                                                            | 0.0%  | 0.0%  | 0.0%  | 0.0%  |
| <b>Q19 - Confirm that the type of wood pellet your mill mainly produces has not changed since you answered the first survey in September 2020</b>                                                          |       |       |       |       |
| Industrial pellets (power generation)                                                                                                                                                                      | 1     | 9     | 4     | 14    |
|                                                                                                                                                                                                            | 14.3% | 81.8% | 80.0% | 60.9% |
| Heating pellets (stoves and boilers)                                                                                                                                                                       | 5     | 0     | 1     | 6     |
|                                                                                                                                                                                                            | 71.4% | 0.0%  | 20.0% | 26.1% |
| Both types in relatively equal proportions                                                                                                                                                                 | 1     | 2     | 0     | 3     |
|                                                                                                                                                                                                            | 14.3% | 18.2% | 0.0%  | 13.0% |
| <b>Q20 - Confirm that the type of contract your company mostly fulfills has not changed since you answered the first survey in September 2020:</b>                                                         |       |       |       |       |
| Short-term                                                                                                                                                                                                 | 3     | 0     | 1     | 4     |
|                                                                                                                                                                                                            | 42.9% | 0.0%  | 20.0% | 17.4% |
| Long-term                                                                                                                                                                                                  | 2     | 8     | 3     | 13    |
|                                                                                                                                                                                                            | 28.6% | 72.7% | 60.0% | 56.5% |
| Mix of both                                                                                                                                                                                                | 2     | 3     | 1     | 6     |
|                                                                                                                                                                                                            | 28.6% | 27.3% | 20.0% | 26.1% |
| Other                                                                                                                                                                                                      | 0     | 0     | 0     | 0     |
|                                                                                                                                                                                                            | 0.0%  | 0.0%  | 0.0%  | 0.0%  |

|                                                                                                                                                                                                                       |       |       |       |       |
|-----------------------------------------------------------------------------------------------------------------------------------------------------------------------------------------------------------------------|-------|-------|-------|-------|
| <b>21. What was the overall impact of the COVID-19 pandemic on your mill's profitability for the entire period between March 2020 and April 2021?</b>                                                                 |       |       |       |       |
| Significantly decreased (more than 20%)                                                                                                                                                                               | 0     | 1     | 0     | 1     |
|                                                                                                                                                                                                                       | 0.0%  | 9.1%  | 0.0%  | 4.3%  |
| Moderately decreased (between 5% and 20%)                                                                                                                                                                             | 0     | 0     | 1     | 1     |
|                                                                                                                                                                                                                       | 0.0%  | 0.0%  | 20.0% | 4.3%  |
| Remained about the same (±5%)                                                                                                                                                                                         | 6     | 9     | 4     | 19    |
|                                                                                                                                                                                                                       | 85.7% | 81.8% | 80.0% | 82.6% |
| Moderately increased (between 5% and 20%)                                                                                                                                                                             | 1     | 1     | 0     | 2     |
|                                                                                                                                                                                                                       | 14.3% | 9.1%  | 0.0%  | 8.7%  |
| Significantly increased (more than 20%)                                                                                                                                                                               | 0     | 0     | 0     | 0     |
|                                                                                                                                                                                                                       | 0.0%  | 0.0%  | 0.0%  | 0.0%  |
| <b>Q22 - What was the overall impact on your mill of the COVID-19 pandemic (March 2020 to April 2021), taking into account all relevant factors such as feedstock, labour, transportation and government support.</b> |       |       |       |       |
| <b>1st wave</b>                                                                                                                                                                                                       |       |       |       |       |
| Strong negative impact                                                                                                                                                                                                | 1     | 0     | 0     | 1     |
|                                                                                                                                                                                                                       | 14.3% | 0.0%  | 0.0%  | 4.3%  |
| Moderate negative impact                                                                                                                                                                                              | 4     | 8     | 1     | 13    |
|                                                                                                                                                                                                                       | 57.1% | 72.7% | 20.0% | 56.5% |
| Small or no impact                                                                                                                                                                                                    | 1     | 1     | 2     | 4     |
|                                                                                                                                                                                                                       | 14.3% | 9.1%  | 40.0% | 17.4% |
| Moderate positive impact                                                                                                                                                                                              | 0     | 0     | 0     | 0     |
|                                                                                                                                                                                                                       | 0.0%  | 0.0%  | 0.0%  | 0.0%  |
| Strong positive impact                                                                                                                                                                                                | 0     | 0     | 0     | 0     |
|                                                                                                                                                                                                                       | 0.0%  | 0.0%  | 0.0%  | 0.0%  |
| <b>2nd and 3rd wave</b>                                                                                                                                                                                               |       |       |       |       |
| Strong negative impact                                                                                                                                                                                                | 0     | 0     | 0     | 0     |
|                                                                                                                                                                                                                       | 0.0%  | 0.0%  | 0.0%  | 0.0%  |
| Moderate negative impact                                                                                                                                                                                              | 2     | 1     | 0     | 3     |
|                                                                                                                                                                                                                       | 28.6% | 9.1%  | 0.0%  | 13.0% |
| Small or no impact                                                                                                                                                                                                    | 1     | 8     | 3     | 12    |
|                                                                                                                                                                                                                       | 14.3% | 72.7% | 60.0% | 52.2% |
| Moderate positive impact                                                                                                                                                                                              | 1     | 1     | 0     | 2     |
|                                                                                                                                                                                                                       | 14.3% | 9.1%  | 0.0%  | 8.7%  |
| Strong positive impact                                                                                                                                                                                                | 0     | 0     | 0     | 0     |
|                                                                                                                                                                                                                       | 0.0%  | 0.0%  | 0.0%  | 0.0%  |
