# Supplementary material
Source: MDPI journal article supplement (https://www.mdpi.com/1996-1073/15/9/3179)
Supplement: s1 [file s1]

Archive with 4 entries (4 files):
- SuppMat1_FirstSurvey_EN.pdf
- SuppMat2_SecondSurvey_EN.pdf
- SuppMat3 _FirstSurvey_Results.pdf
- SuppMat4_SecondSurvey_Results.pdf
