# Supplementary material
Source: MDPI journal article supplement (https://www.mdpi.com/1996-1073/15/9/3179)
Supplement: s1 [file s1 › SuppMat3 _FirstSurvey_Results.pdf]

|                                                                                                                                                               | Survey 1 |           |           |           |
|---------------------------------------------------------------------------------------------------------------------------------------------------------------|----------|-----------|-----------|-----------|
|                                                                                                                                                               | QC       | BC        | Other     | Total     |
| <b>Number of mills</b>                                                                                                                                        | <b>7</b> | <b>14</b> | <b>10</b> | <b>31</b> |
| <b>Q1 - Since the COVID-19 pandemic outbreak in March 2020, feedstock prices for my mill have:</b>                                                            |          |           |           |           |
| Significantly decreased more than 20% compared to the prices anticipated before March 2020                                                                    | 0        | 0         | 0         | 0         |
|                                                                                                                                                               | 0.0%     | 0.0%      | 0.0%      | 0.0%      |
| Moderately decreased (between 5% and 20%) compared to the prices anticipated before March 2020                                                                | 0        | 2         | 0         | 2         |
|                                                                                                                                                               | 0.0%     | 14.3%     | 0.0%      | 6.5%      |
| Remained about the same (±5%) compared to the prices anticipated before March 2020                                                                            | 4        | 11        | 9         | 24        |
|                                                                                                                                                               | 57.1%    | 78.6%     | 90.0%     | 77.4%     |
| Moderately increased (between 5% and 20%) compared to the prices anticipated before March 2020                                                                | 3        | 1         | 1         | 5         |
|                                                                                                                                                               | 42.9%    | 7.1%      | 10.0%     | 16.1%     |
| Significantly increased more than 20 % compared to the prices anticipated before March 2020                                                                   | 0        | 0         | 0         | 0         |
|                                                                                                                                                               | 0.0%     | 0.0%      | 0.0%      | 0.0%      |
| <b>Q2 - Prior to the COVID-19 pandemic outbreak in March 2020, the feedstock mix for 2020 for my mill was expected to:</b>                                    |          |           |           |           |
| Remain the same as for 2019                                                                                                                                   | 5        | 8         | 8         | 21        |
|                                                                                                                                                               | 71.4%    | 57.1%     | 80.0%     | 67.7%     |
| Include more non-sawmill residues (e.g. roundwood, harvest residues) than 2019                                                                                | 1        | 3         | 2         | 6         |
|                                                                                                                                                               | 14.3%    | 21.4%     | 20.0%     | 19.4%     |
| Include less non-sawmill residues (e.g. roundwood, harvest residues) than 2019                                                                                | 1        | 3         | 0         | 4         |
|                                                                                                                                                               | 14.3%    | 21.4%     | 0.0%      | 12.9%     |
| <b>Q3 - Since the COVID-19 pandemic outbreak in March 2020, the feedstock mix for my mill:</b>                                                                |          |           |           |           |
| Remained the same as expected before March 2020                                                                                                               | 4        | 6         | 7         | 17        |
|                                                                                                                                                               | 57.1%    | 42.9%     | 70.0%     | 54.8%     |
| Includes more non-sawmill residues (e.g. roundwood, harvest residues) than expected before March 2020                                                         | 0        | 7         | 2         | 9         |
|                                                                                                                                                               | 0.0%     | 50.0%     | 20.0%     | 29.0%     |
| Includes less non-sawmill residues (e.g. roundwood, harvest residues) than expected before March 2020                                                         | 3        | 1         | 1         | 5         |
|                                                                                                                                                               | 42.9%    | 7.1%      | 10.0%     | 16.1%     |
| Do not know / unsure                                                                                                                                          | 0        | 0         | 0         | 0         |
|                                                                                                                                                               | 0.0%     | 0.0%      | 0.0%      | 0.0%      |
| <b>Q5- Because of the COVID-19 pandemic outbreak in March 2020, the overall availability of feedstock for my mill:</b>                                        |          |           |           |           |
| Remained the same                                                                                                                                             | 4        | 7         | 5         | 16        |
|                                                                                                                                                               | 57.1%    | 50.0%     | 50.0%     | 51.6%     |
| Increased                                                                                                                                                     | 0        | 1         | 3         | 4         |
|                                                                                                                                                               | 0.0%     | 7.1%      | 30.0%     | 12.9%     |
| Decreased                                                                                                                                                     | 3        | 6         | 2         | 11        |
|                                                                                                                                                               | 42.9%    | 42.9%     | 20.0%     | 35.5%     |
| Do not know / unsure                                                                                                                                          | 0        | 0         | 0         | 0         |
|                                                                                                                                                               | 0.0%     | 0.0%      | 0.0%      | 0.0%      |
| <b>Q6 - Has transportation of material inputs or finished products at your mill been disrupted at all since the COVID-19 pandemic outbreak in March 2020?</b> |          |           |           |           |
| Yes                                                                                                                                                           | 1        | 10        | 2         | 13        |
|                                                                                                                                                               | 14.3%    | 71.4%     | 20.0%     | 41.9%     |
| No                                                                                                                                                            | 5        | 4         | 8         | 17        |
|                                                                                                                                                               | 71.4%    | 28.6%     | 80.0%     | 54.8%     |
| Do not know / unsure                                                                                                                                          | 1        | 0         | 0         | 1         |
|                                                                                                                                                               | 14.3%    | 0.0%      | 0.0%      | 3.2%      |

|                                                                                                                        |        |       |       |       |
|------------------------------------------------------------------------------------------------------------------------|--------|-------|-------|-------|
| <b>Q7 - Which aspects of transporting material inputs of finished products has been disrupted?</b>                     |        |       |       |       |
| Transporting feedstocks into my facility                                                                               | 0      | 8     | 2     | 10    |
|                                                                                                                        | 0.0%   | 57.1% | 20.0% | 32.3% |
| Transporting other inputs into my facility                                                                             | 0      | 1     | 0     | 1     |
|                                                                                                                        | 0.0%   | 7.1%  | 0.0%  | 3.2%  |
| Transporting wood pellets out from my facility to bulk storage / port                                                  | 0      | 8     | 1     | 9     |
|                                                                                                                        | 0.0%   | 57.1% | 10.0% | 29.0% |
| Transporting wood pellets out of the bulk storage / port to the final destination                                      | 0      | 1     | 0     | 1     |
|                                                                                                                        | 0.0%   | 7.1%  | 0.0%  | 3.2%  |
| Other                                                                                                                  | 1      | 1     | 0     | 2     |
|                                                                                                                        | 14.3%  | 7.1%  | 0.0%  | 6.5%  |
| <b>Q8 - Because of the COVID-19 pandemic, the access to transportation services for shipping raw materials</b>         |        |       |       |       |
| Remained the same                                                                                                      | 7      | 7     | 8     | 22    |
|                                                                                                                        | 100.0% | 50.0% | 80.0% | 71.0% |
| Improved                                                                                                               | 0      | 0     | 0     | 0     |
|                                                                                                                        | 0.0%   | 0.0%  | 0.0%  | 0.0%  |
| Worsened                                                                                                               | 0      | 7     | 2     | 9     |
|                                                                                                                        | 0.0%   | 50.0% | 20.0% | 29.0% |
| Do not know / unsure                                                                                                   | 0      | 0     | 0     | 0     |
|                                                                                                                        | 0.0%   | 0.0%  | 0.0%  | 0.0%  |
| <b>Q9 - Because of the COVID-19 pandemic, the access to transportation services for shipping finished products:</b>    |        |       |       |       |
| Remained the same                                                                                                      | 6      | 5     | 8     | 19    |
|                                                                                                                        | 85.7%  | 35.7% | 80.0% | 61.3% |
| Improved                                                                                                               | 0      | 0     | 1     | 1     |
|                                                                                                                        | 0.0%   | 0.0%  | 10.0% | 3.2%  |
| Worsened                                                                                                               | 1      | 9     | 1     | 11    |
|                                                                                                                        | 14.3%  | 64.3% | 10.0% | 35.5% |
| Do not know / unsure                                                                                                   | 0      | 0     | 0     | 0     |
|                                                                                                                        | 0.0%   | 0.0%  | 0.0%  | 0.0%  |
| <b>Q10- Has your mill experienced any COVID-19 related labour shortages since the pandemic outbreak in March 2020?</b> |        |       |       |       |
| No                                                                                                                     | 2      | 11    | 8     | 21    |
|                                                                                                                        | 28.6%  | 78.6% | 80.0% | 67.7% |
| Yes                                                                                                                    | 5      | 3     | 2     | 10    |
|                                                                                                                        | 71.4%  | 21.4% | 20.0% | 32.3% |
| <b>Q11 - Since the COVID-19 pandemic outbreak in March 2020, did your mill have to close?</b>                          |        |       |       |       |
| No                                                                                                                     | 5      | 13    | 9     | 27    |
|                                                                                                                        | 71.4%  | 92.9% | 90.0% | 87.1% |
| Yes (1 to 4 weeks)                                                                                                     | 2      | 0     | 1     | 3     |
|                                                                                                                        | 28.6%  | 0.0%  | 10.0% | 9.7%  |
| Yes (5 to 10 weeks)                                                                                                    | 0      | 1     | 0     | 1     |
|                                                                                                                        | 0.0%   | 7.1%  | 0.0%  | 3.2%  |
| Yes (more than 10 weeks)                                                                                               | 0      | 0     | 0     | 0     |
|                                                                                                                        | 0.0%   | 0.0%  | 0.0%  | 0.0%  |
| Do not know / unsure                                                                                                   | 0      | 0     | 0     | 0     |
|                                                                                                                        | 0.0%   | 0.0%  | 0.0%  | 0.0%  |

|                                                                                                                                                     |        |       |        |       |
|-----------------------------------------------------------------------------------------------------------------------------------------------------|--------|-------|--------|-------|
| <b>Q13 - Since the COVID-19 pandemic outbreak in March 2020, has your mill reduced its production?</b>                                              |        |       |        |       |
| Decrease                                                                                                                                            | 3      | 3     | 0      | 6     |
|                                                                                                                                                     | 42.9%  | 21.4% | 0.0%   | 19.4% |
| Increase                                                                                                                                            | 0      | 0     | 0      | 0     |
|                                                                                                                                                     | 0.0%   | 0.0%  | 0.0%   | 0.0%  |
| No change                                                                                                                                           | 4      | 11    | 10     | 25    |
|                                                                                                                                                     | 57.1%  | 78.6% | 100.0% | 80.6% |
| <b>Q15 - Why was there a reduction in production?</b>                                                                                               |        |       |        |       |
| Reduction because of labour shortages                                                                                                               | 0      | 0     | 0      | 0     |
|                                                                                                                                                     | 0.0%   | 0.0%  | 0.0%   | 0.0%  |
| Reduction in production due to lockdown                                                                                                             | 0      | 2     | 0      | 2     |
|                                                                                                                                                     | 0.0%   | 14.3% | 0.0%   | 6.5%  |
| Declining end use                                                                                                                                   | 0      | 2     | 0      | 2     |
|                                                                                                                                                     | 0.0%   | 14.3% | 0.0%   | 6.5%  |
| Increasing end use                                                                                                                                  | 0      | 0     | 0      | 0     |
|                                                                                                                                                     | 0.0%   | 0.0%  | 0.0%   | 0.0%  |
| Other                                                                                                                                               | 3      | 3     | 0      | 6     |
|                                                                                                                                                     | 42.9%  | 20.0% | 0.0%   | 18.8% |
| <b>Q16 - How did your mill adapt to the impacts of the COVID-19 in their operations?</b>                                                            |        |       |        |       |
| No changes                                                                                                                                          | 0      | 6     | 1      | 7     |
|                                                                                                                                                     | 0.0%   | 40.0% | 10.0%  | 21.9% |
| Additional health and safety measures (e.g., personal protective equipment, cleaning of work areas and surfaces)                                    | 7      | 8     | 9      | 24    |
|                                                                                                                                                     | 100.0% | 53.3% | 90.0%  | 75.0% |
| Reorganized staffing levels because of social distancing requirements or other reasons                                                              | 4      | 4     | 4      | 12    |
|                                                                                                                                                     | 57.1%  | 26.7% | 40.0%  | 37.5% |
| Investment in equipment or machinery to replace labour                                                                                              | 1      | 0     | 1      | 2     |
|                                                                                                                                                     | 14.3%  | 0.0%  | 10.0%  | 6.3%  |
| <b>Q17 - Since the COVID-19 pandemic outbreak in March 2020, my mill benefited from the following measures adopted by the federal government</b>    |        |       |        |       |
| Wage subsidies                                                                                                                                      | 5      | 2     | 2      | 9     |
|                                                                                                                                                     | 71.4%  | 13.3% | 20.0%  | 28.1% |
| Subsidies to cover additional costs incurred because of COVID-19                                                                                    | 0      | 0     | 0      | 0     |
|                                                                                                                                                     | 0.0%   | 0.0%  | 0.0%   | 0.0%  |
| Deferral of income taxes or sales tax                                                                                                               | 0      | 2     | 1      | 3     |
|                                                                                                                                                     | 0.0%   | 13.3% | 10.0%  | 9.4%  |
| Access to credit through loans, loan guarantees or emergency financing                                                                              | 1      | 0     | 1      | 2     |
|                                                                                                                                                     | 14.3%  | 0.0%  | 10.0%  | 6.3%  |
| Other                                                                                                                                               | 0      | 0     | 1      | 1     |
|                                                                                                                                                     | 0.0%   | 0.0%  | 10.0%  | 3.1%  |
| <b>Q18 - Since the COVID-19 pandemic outbreak in March 2020, my mill benefited from the following measures adopted by the provincial government</b> |        |       |        |       |
| Wage subsidies                                                                                                                                      | 1      | 0     | 1      | 2     |
|                                                                                                                                                     | 14.3%  | 0.0%  | 10.0%  | 6.3%  |
| Subsidies to cover additional costs incurred because of COVID-19                                                                                    | 0      | 0     | 0      | 0     |
|                                                                                                                                                     | 0.0%   | 0.0%  | 0.0%   | 0.0%  |
| Deferral of income taxes or sales tax                                                                                                               | 0      | 2     | 0      | 2     |
|                                                                                                                                                     | 0.0%   | 13.3% | 0.0%   | 6.3%  |
| Access to credit through loans, loan guarantees or emergency financing                                                                              | 0      | 0     | 1      | 1     |
|                                                                                                                                                     | 0.0%   | 0.0%  | 10.0%  | 3.1%  |
| Other                                                                                                                                               | 0      | 6     | 2      | 8     |
|                                                                                                                                                     | 0.0%   | 40.0% | 20.0%  | 25.0% |

|                                                                                  |       |       |       |       |
|----------------------------------------------------------------------------------|-------|-------|-------|-------|
| <b>Q19 - What type of wood pellet does your mill mainly produce</b>              |       |       |       |       |
| Industrial pellets (power generation)                                            | 1     | 12    | 4     | 17    |
|                                                                                  | 14.3% | 80.0% | 40.0% | 53.1% |
| Heating pellets (stoves and boilers)                                             | 6     | 1     | 6     | 13    |
|                                                                                  | 85.7% | 6.7%  | 60.0% | 40.6% |
| Both types in relatively equal proportions                                       | 0     | 1     | 0     | 1     |
|                                                                                  | 0.0%  | 6.7%  | 0.0%  | 3.1%  |
| <b>Q20 - Does your company fulfill mostly long-term or short-term contracts?</b> |       |       |       |       |
| Short-term                                                                       | 5     | 0     | 1     | 6     |
|                                                                                  | 71.4% | 0.0%  | 10.0% | 18.8% |
| Long-term                                                                        | 1     | 12    | 3     | 16    |
|                                                                                  | 14.3% | 80.0% | 30.0% | 50.0% |
| Mix of both                                                                      | 0     | 1     | 5     | 6     |
|                                                                                  | 0.0%  | 6.7%  | 50.0% | 18.8% |
| Other                                                                            | 1     | 1     | 1     | 3     |
|                                                                                  | 14.3% | 6.7%  | 10.0% | 9.4%  |
